# Supplementary material for: Secondary Metabolism and Biotrophic Lifestyle in the Tomato Pathogen Cladosporium fulvum
Source: PubMed Central journal article supplement (PMC3895014; doi:10.1371/journal.pone.0085877), 2014-01-17
Supplement: pone.0085877.s001.pdf [file pone.0085877.s001.pdf]

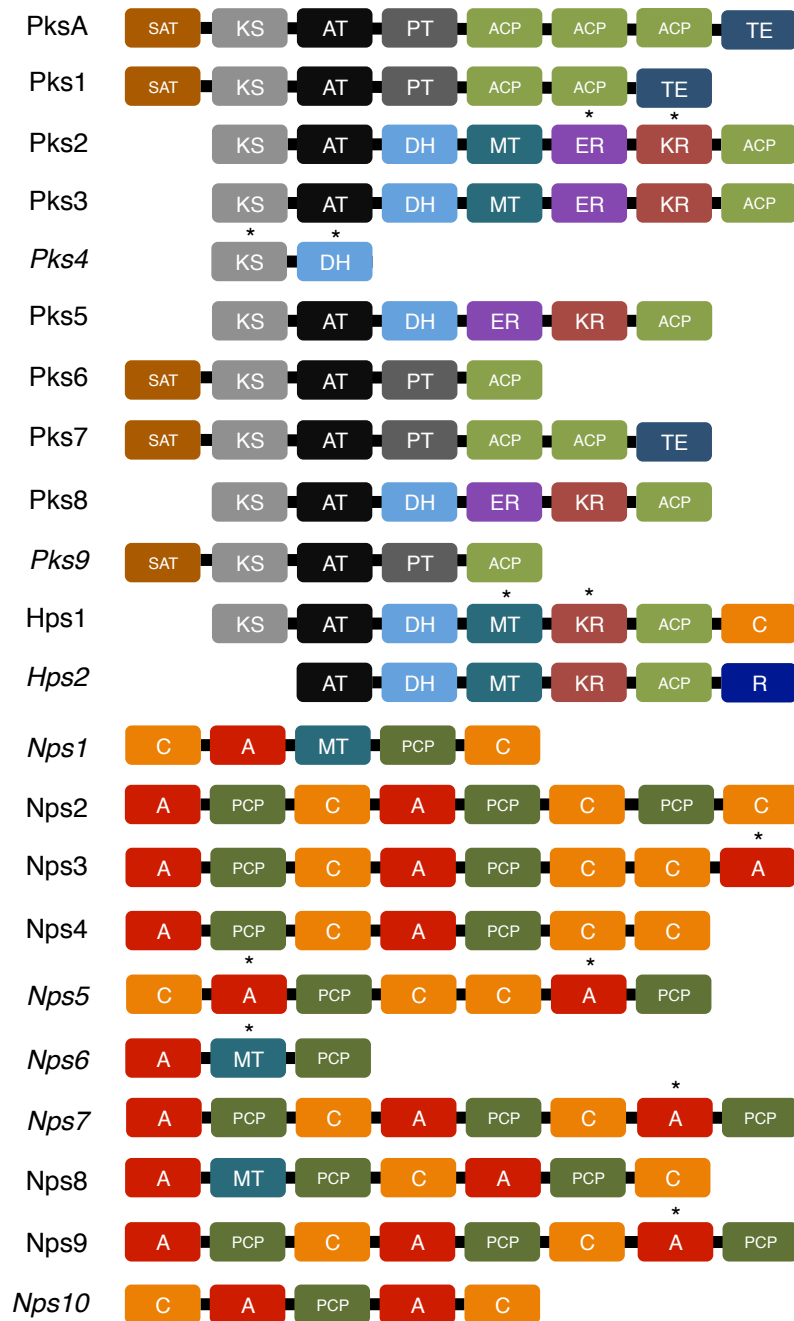

**Figure S1. Domain organization of *Cladosporium fulvum* key secondary metabolism enzymes.**

SAT: starter unit:ACP transacylase; KS: keto-synthase; AT: acyl transferase; PT: product template; ACP: acyl carrier protein; TE: thiolesterase; DH: dehydratase; ER: enoyl reductase; KR: keto-reductase; MT: C- or N-methyl transferase; R: reductase; A: adenylation; PCP: peptidyl carrier protein; C: condensation. Predicted non-functional enzymes are indicated in italics. Stars indicate domains that are likely not functional because conserved catalytic residues are mutated (data not shown).

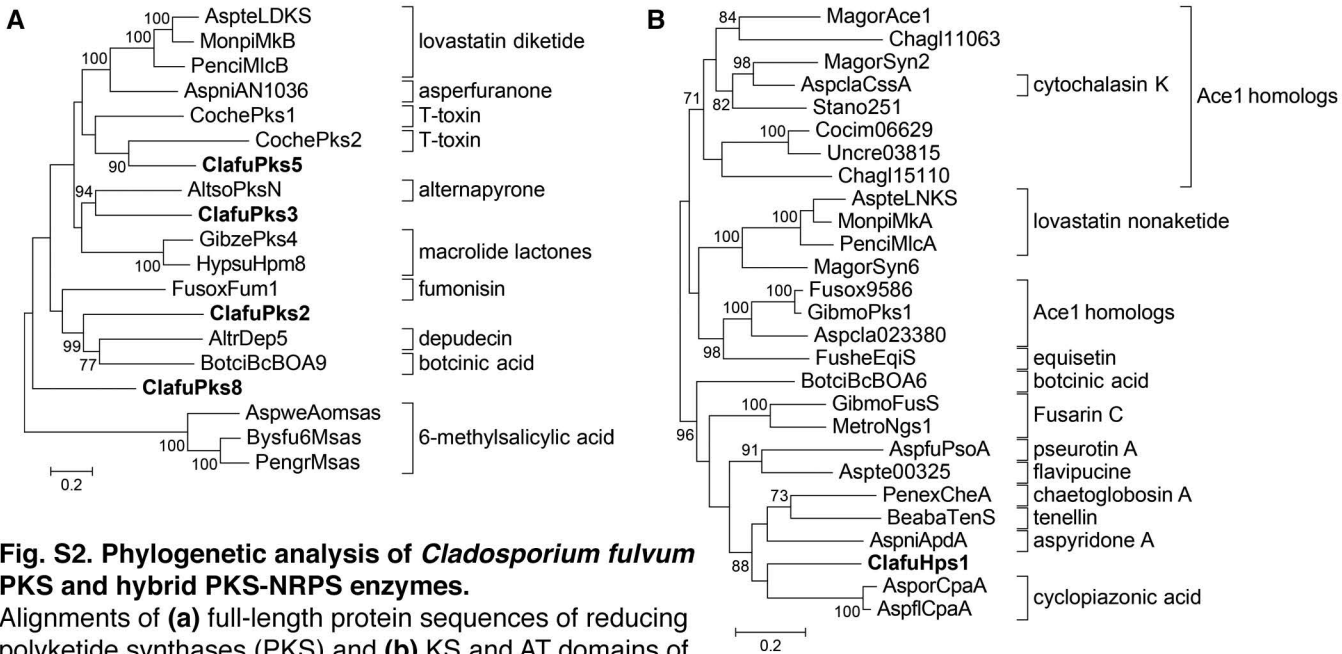

**Fig. S2. Phylogenetic analysis of *Cladosporium fulvum* PKS and hybrid PKS-NRPS enzymes.**

Alignments of (a) full-length protein sequences of reducing polyketide synthases (PKS) and (b) KS and AT domains of hybrid polyketide synthase-non-ribosomal peptide synthetases (PKS-NRPS) were used to construct maximum likelihood phylogenetic trees. Only bootstrap values over 70 are shown. *C. fulvum* secondary metabolism enzymes are indicated in bold. Accession numbers are given in Table S1 and Table S4.

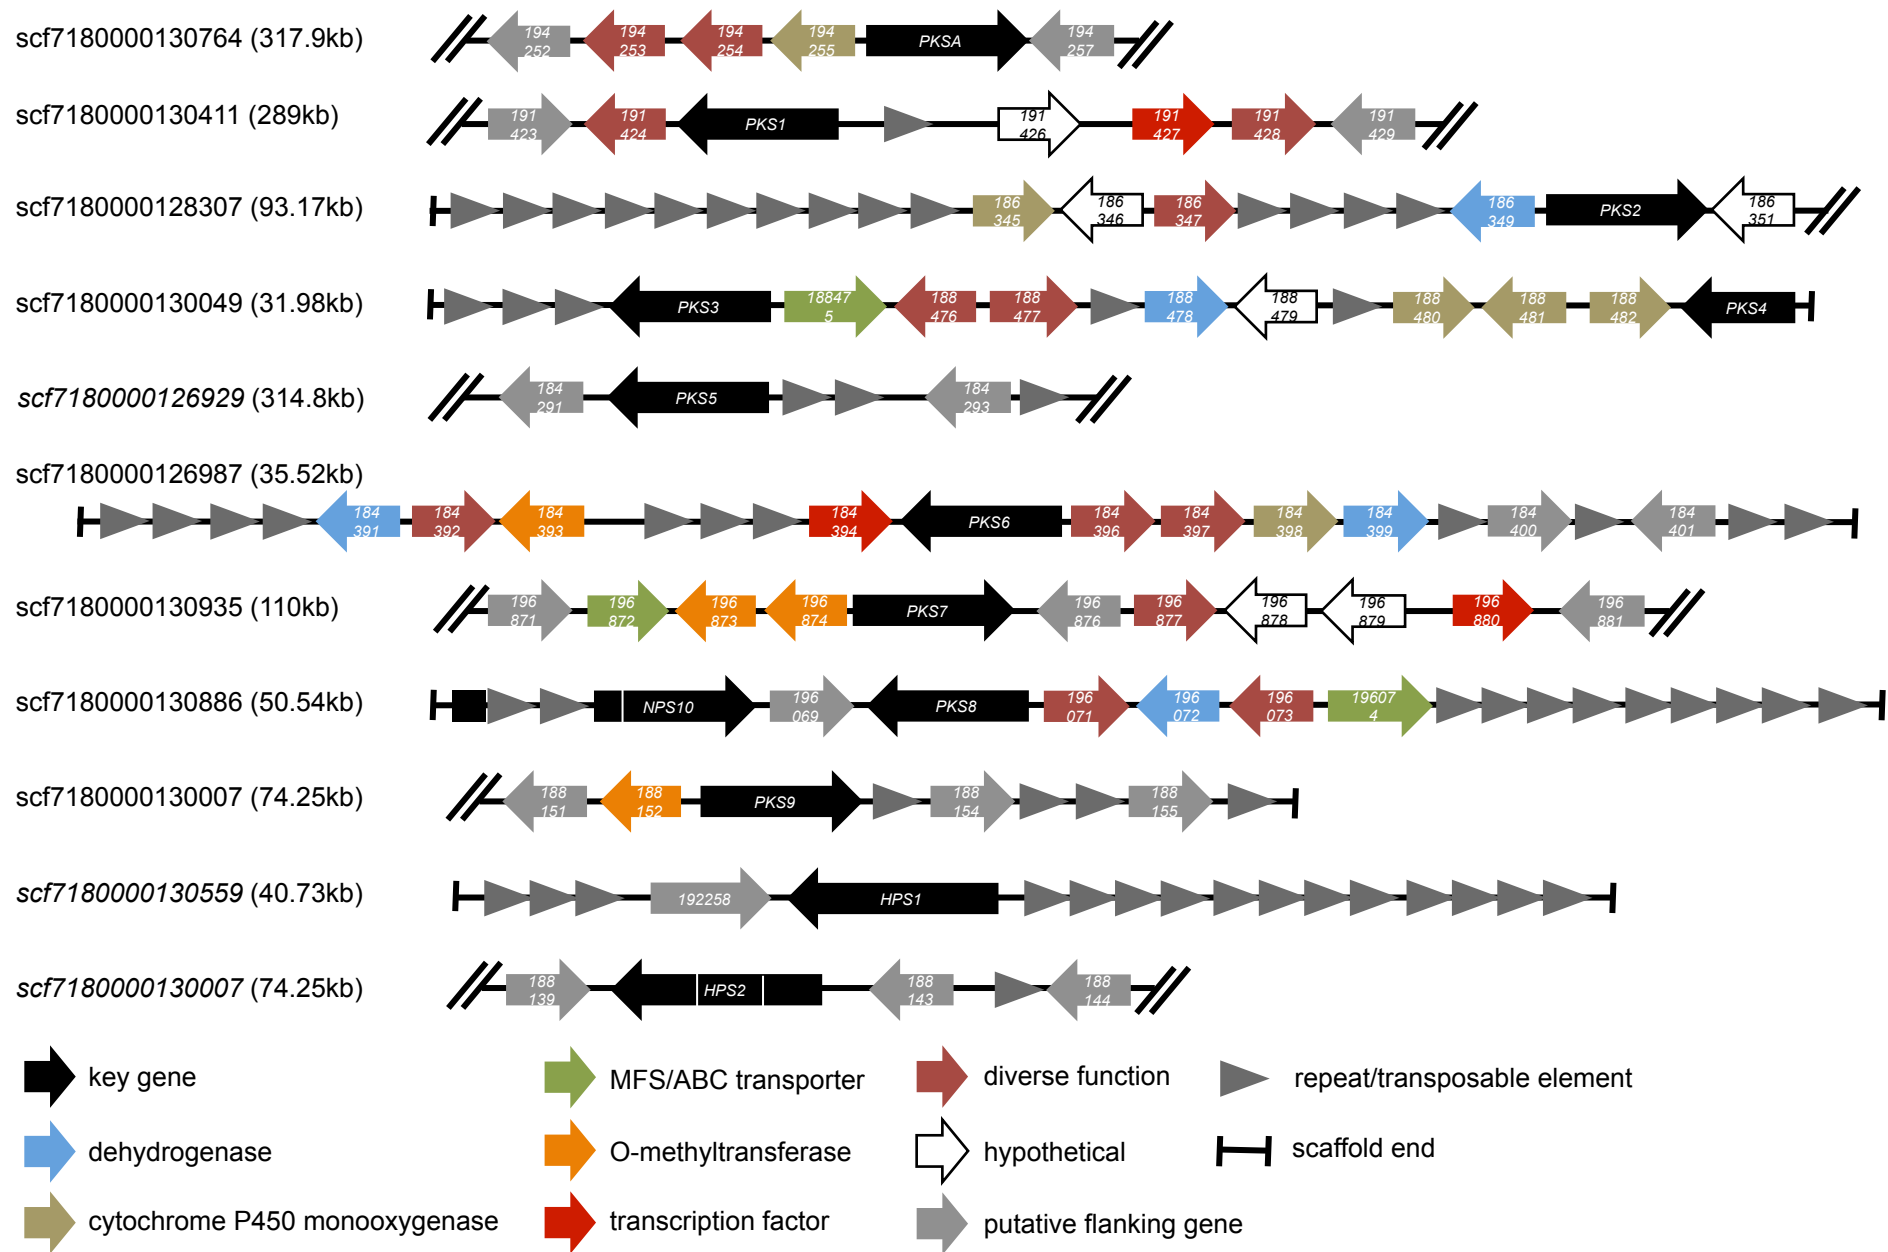

**Figure S3. Locus organization of polyketide synthase and hybrid genes in the *Cladosporium fulvum* genome.** White lines within key genes indicate pseudogenization. The PKSA gene cluster is fully depicted in De Wit *et al.* (2012) and Chettri *et al.* (2013).

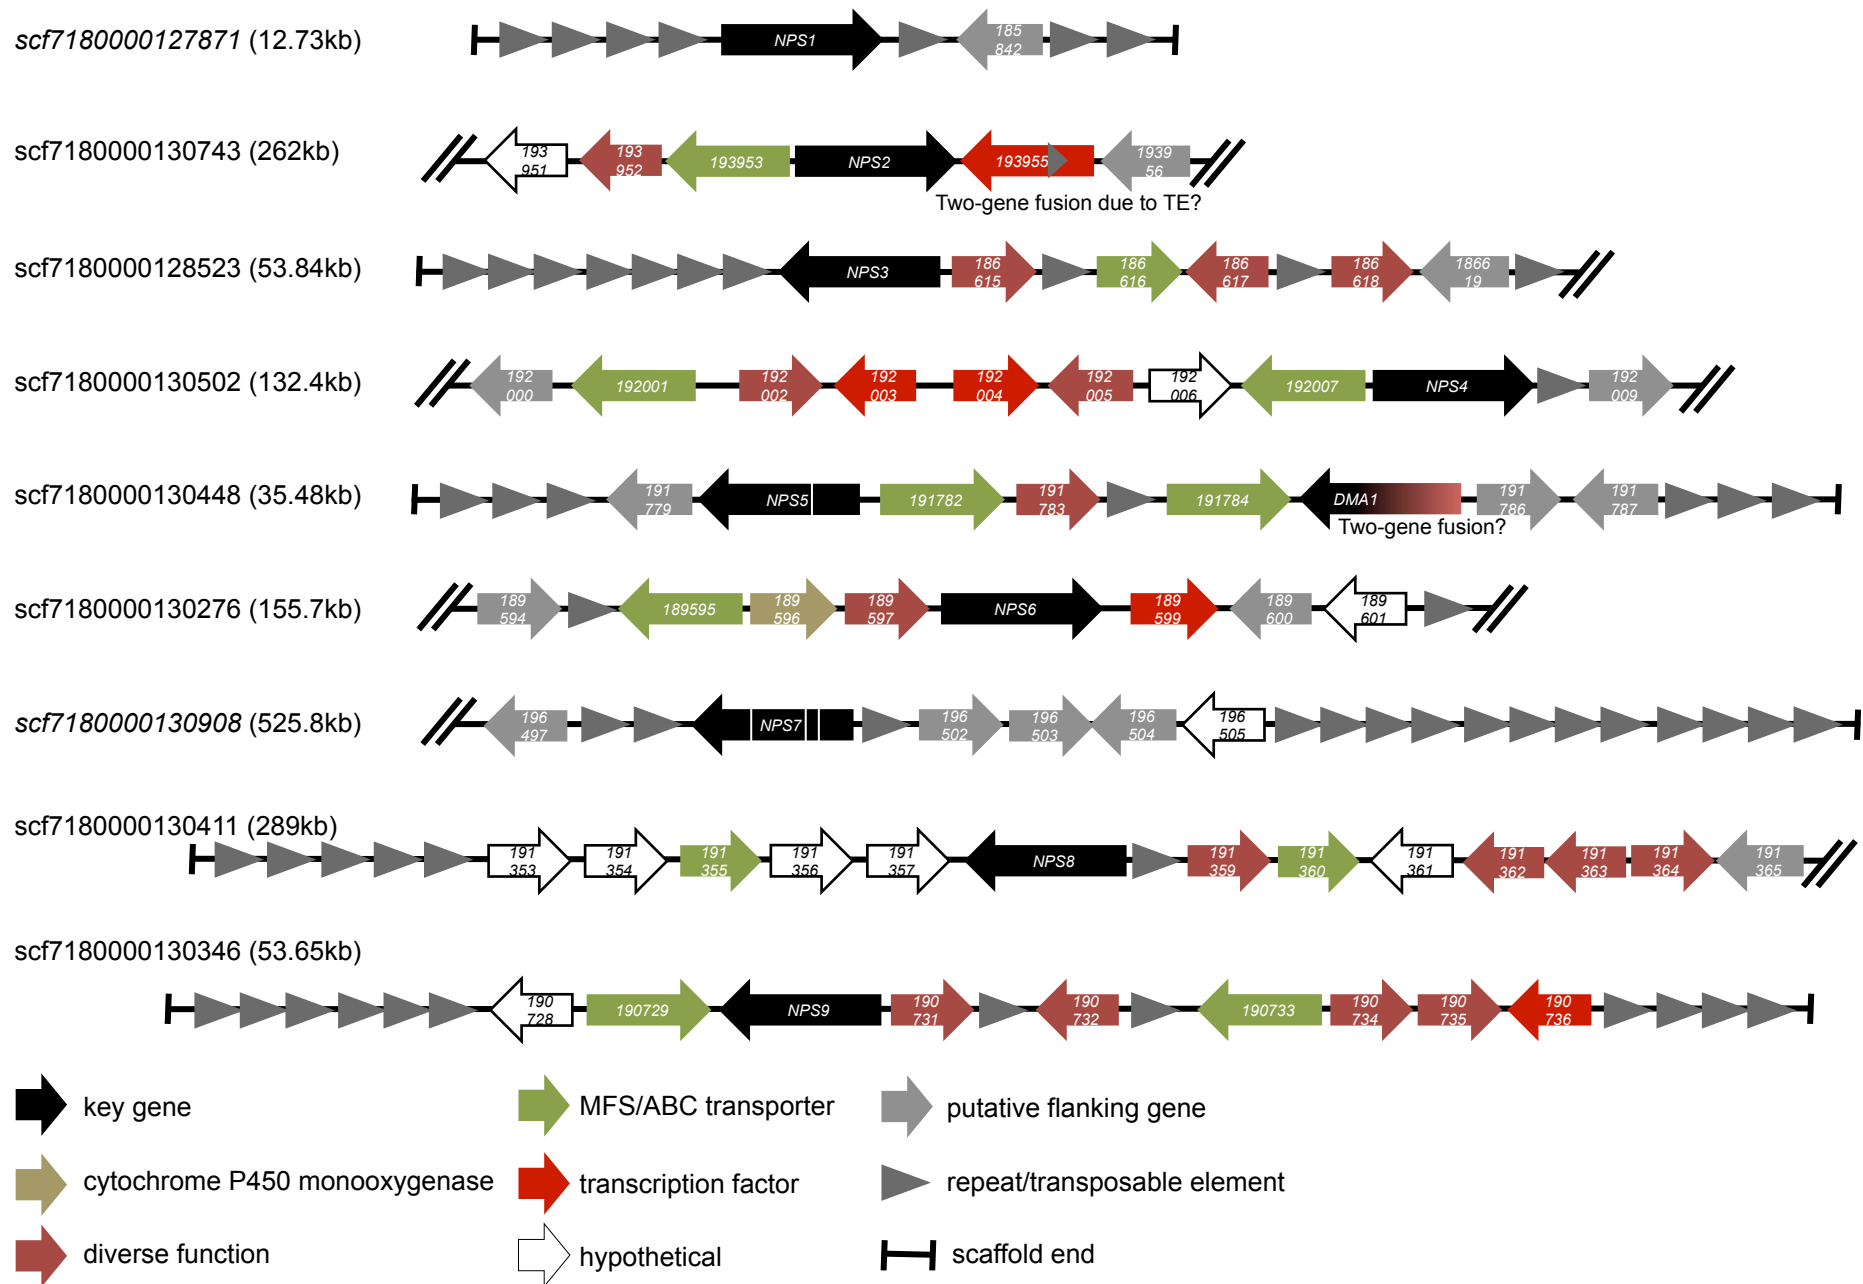

**Figure S4. Locus organization of non-ribosomal peptide synthetase genes in the *Cladosporium fulvum* genome.** White lines within key genes indicate pseudogenization.

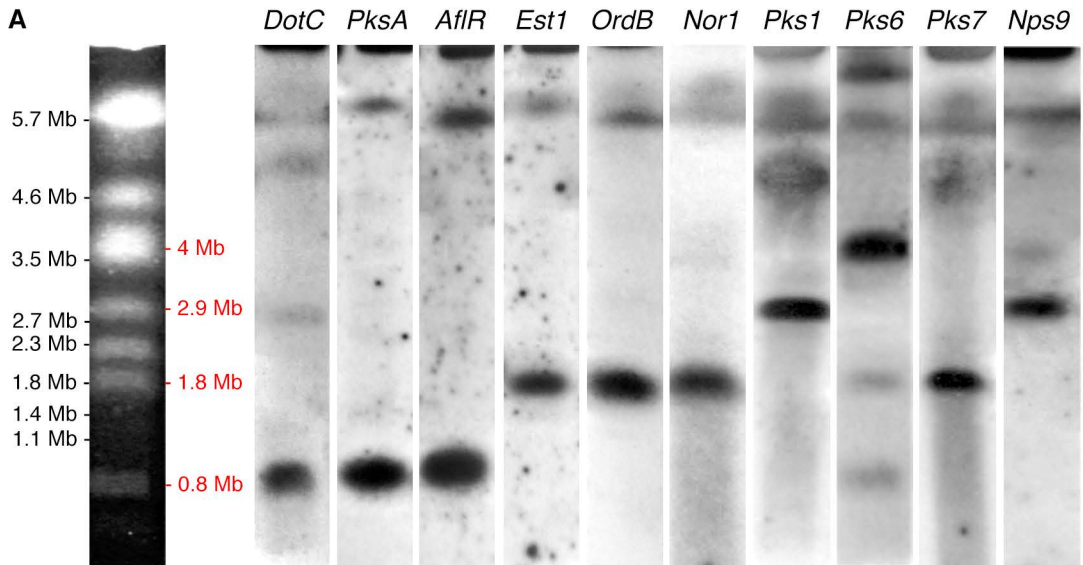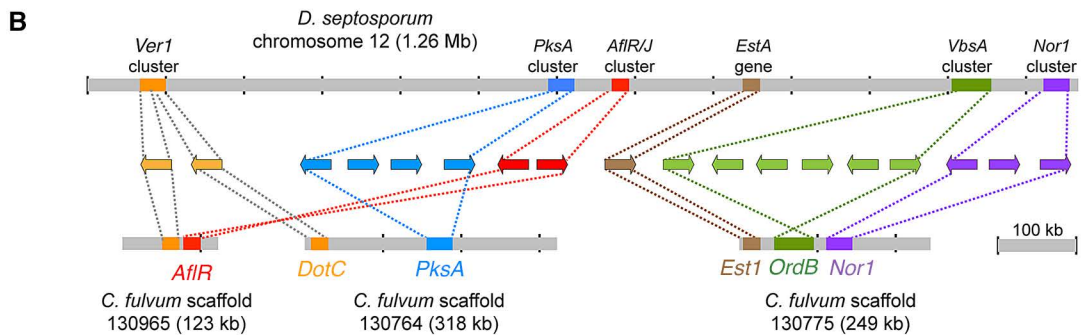

**Fig. S5. Localization of secondary metabolism genes on chromosomes of *Cladosporium fulvum*.** (a) CHEF gel electrophoresis was performed to separate chromosomes of *C. fulvum* (left lane) and large size DNA was transferred onto nylon membrane. Specific probes corresponding to genes from different clusters were hybridized to identify chromosomes that carry them. Size standards indicated on the left are from chromosome preparations of *Schizosaccharomyces pombe* and *Hansenula wingei*. In red are indicated the size of the *C. fulvum* chromosomes that carry secondary metabolism genes. (b) Organization of the dothistromin gene cluster is shown in *Dothistroma septosporum* and *C. fulvum* (adapted from de Wit *et al.*, 2012).

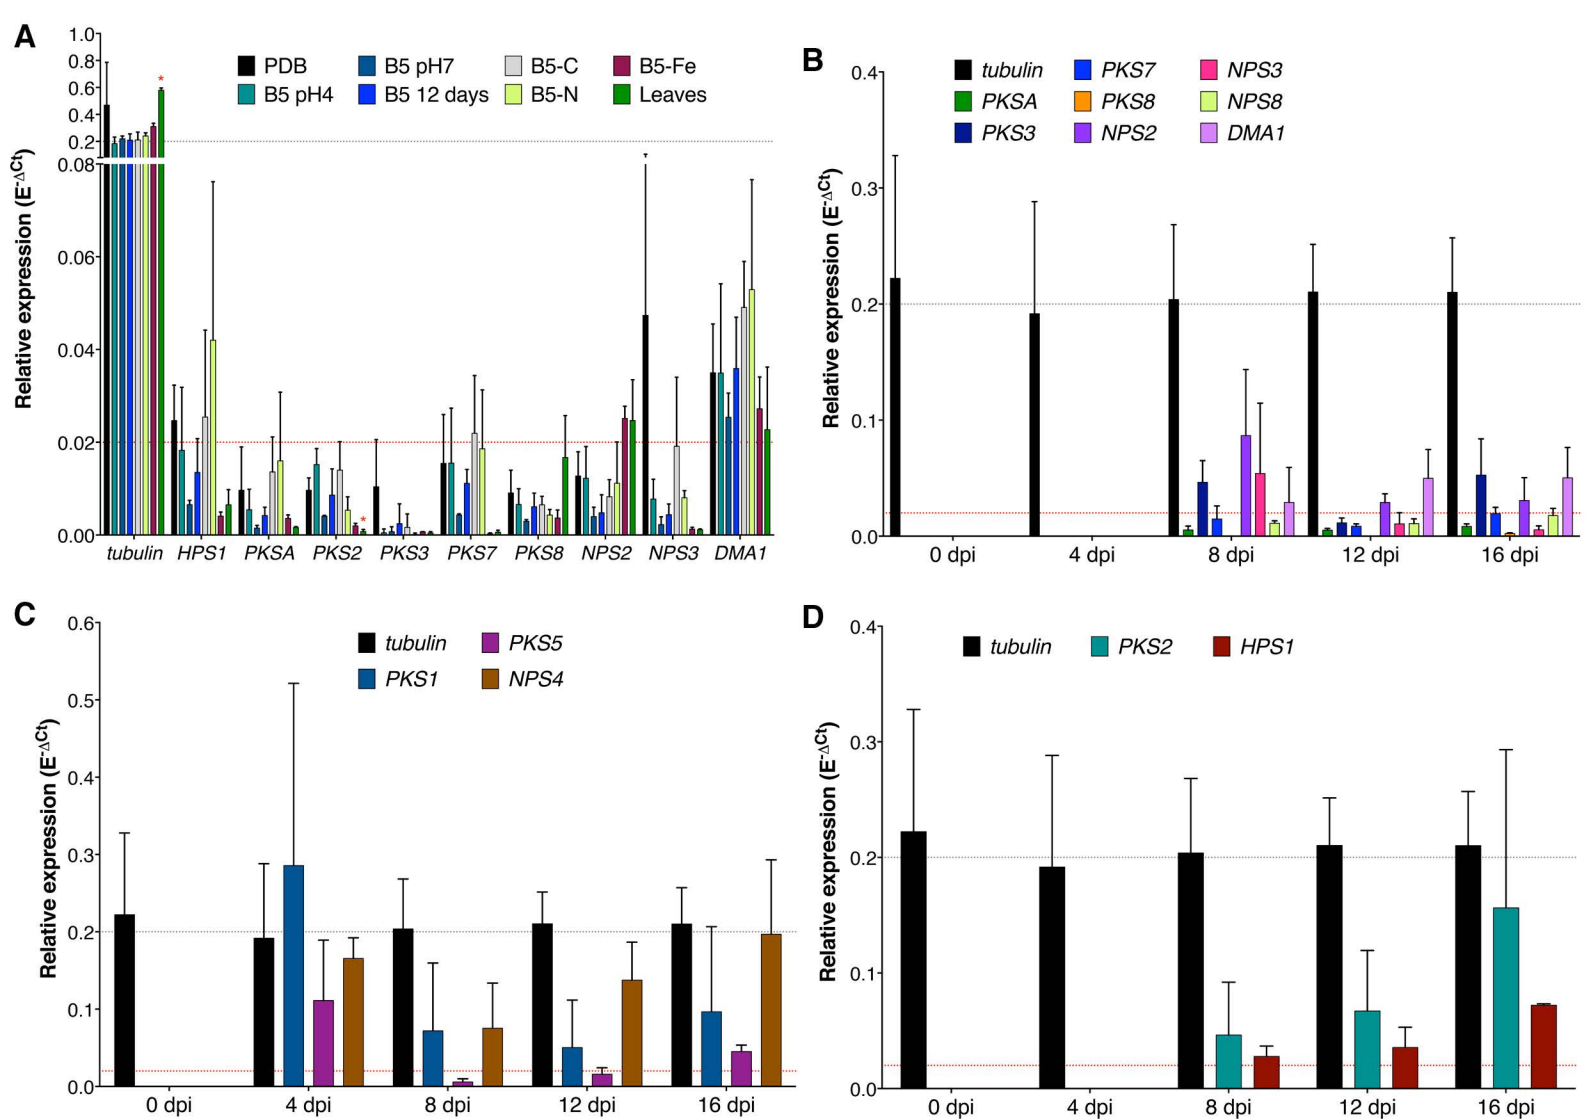

**Fig. S6. Expression profile of *Cladosporium fulvum* secondary metabolism functional key genes.** Gene expression was measured using RT-qrtPCR (a) under *in vitro* conditions, including B5 without carbon (C), nitrogen (N) or iron (Fe), and autoclaved leaves; and (b), (c) and (d) during infection of tomato from 0 to 16 days post inoculation (dpi). (c) Genes for which expression seems to decrease over time. (d) Genes for which expression seems to increase over time. The data was normalized to the actin gene and analyzed using the  $E^{-\Delta Ct}$  method, where E is the primer pair efficiency of a given gene. The grey dotted line indicates the tubulin expression level and the red dotted lines indicate the expression threshold 10-fold lower than the average tubulin expression level. Values are the mean of three biological repeats and error bars represent the standard deviation. Expression in each *in vitro* condition was compared to expression in B5 pH4 using multiple t-tests, not assuming consistent SD, correcting for multiple comparisons with the Holm-Sidak method, at the alpha significance threshold of 0.05. For each gene, each *in planta* time point was compared to the previous one using a Two-way ANOVA followed by a multiple comparison test corrected with the Holm-Sidak method at the alpha significance threshold of 0.05. Significant differences are indicated by red stars.

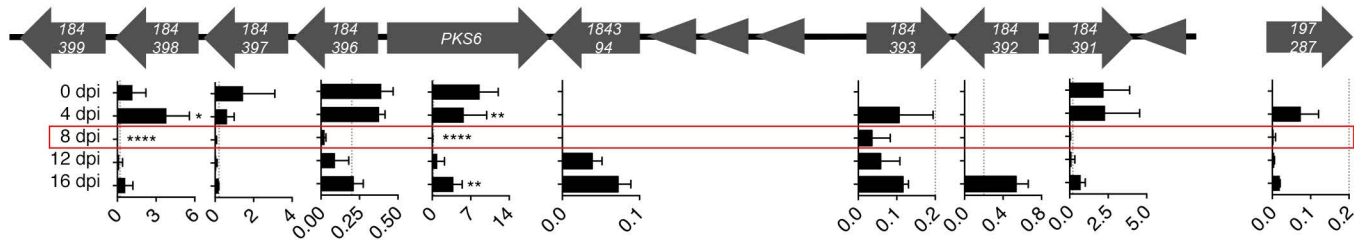

**Fig. S7. Expression profile of genes located at the *PKS6* gene locus.**

Gene expression was measured using RT-qrtPCR during infection of tomato from 0 to 16 days post inoculation (dpi). The data was normalized to the actin gene and relative expression is indicated on the X axis using the  $E^{-\Delta Ct}$  method, where E is the primer pair efficiency of a given gene. The grey dotted line indicates the tubulin expression level. The red square indicates the time point when the expression of genes is at the lowest level.



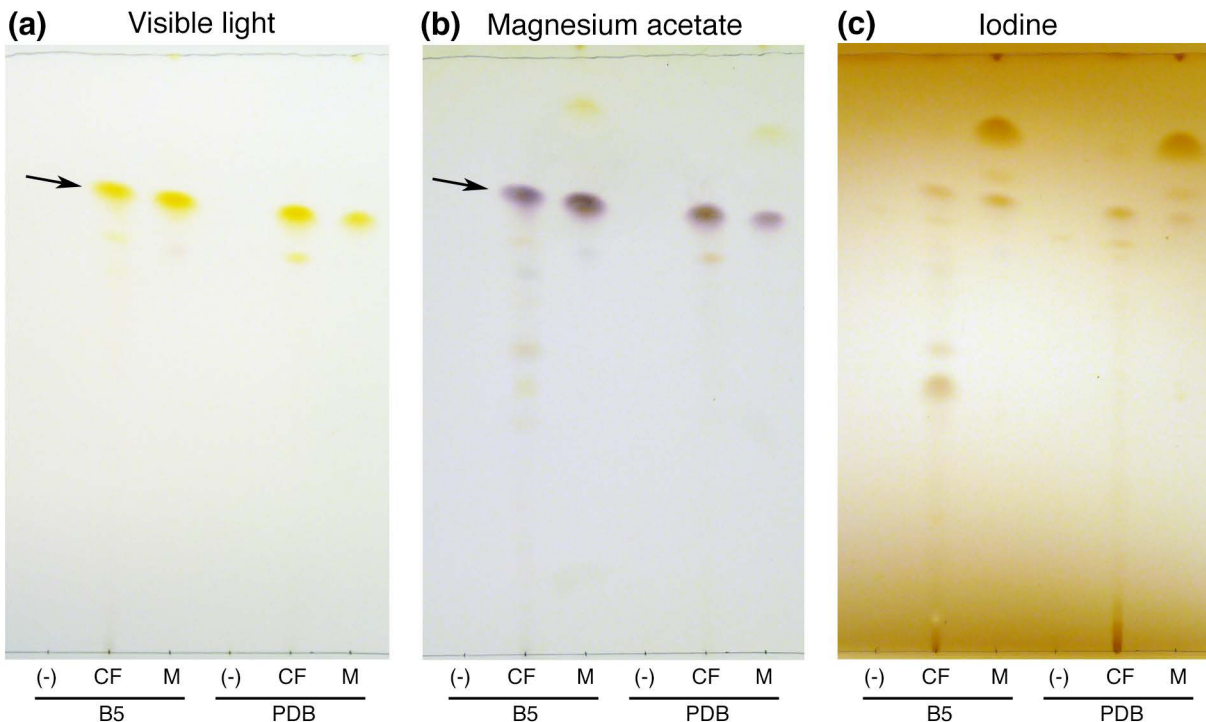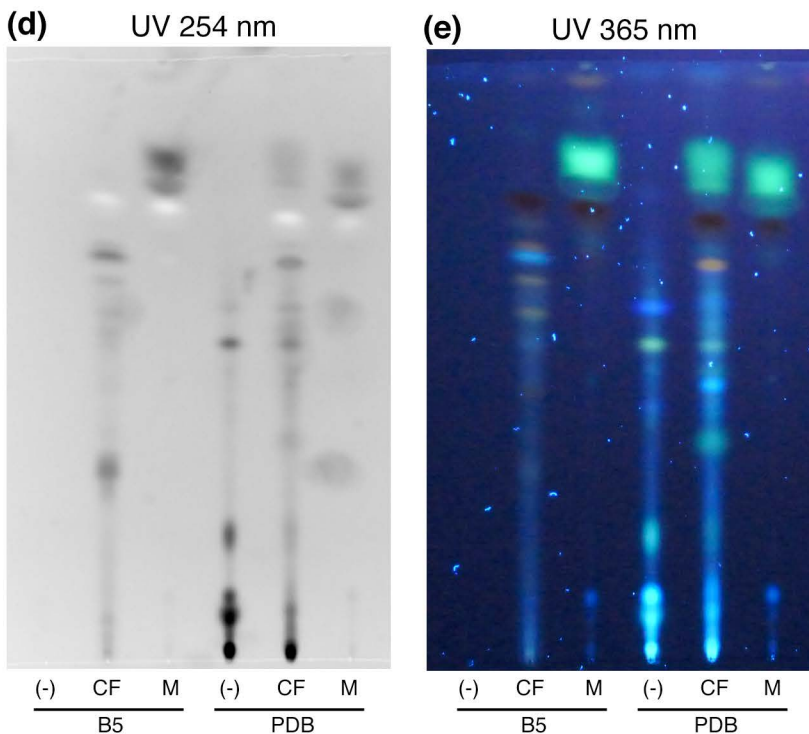

**Figure S8. Thin layer chromatography (TLC) analysis of *Cladosporium fulvum* secondary metabolites.** TLC plate pictures were taken (a) under visible light, (b) after staining with 4% magnesium acetate in methanol, (c) after iodine staining, (d) under 254 nm UV light and (e) under 365 nm UV light. Arrows indicate the position of cladofulvin. (-) control (sterile medium); CF, culture filtrate; M, mycelium.



*Nicotiana benthamiana*

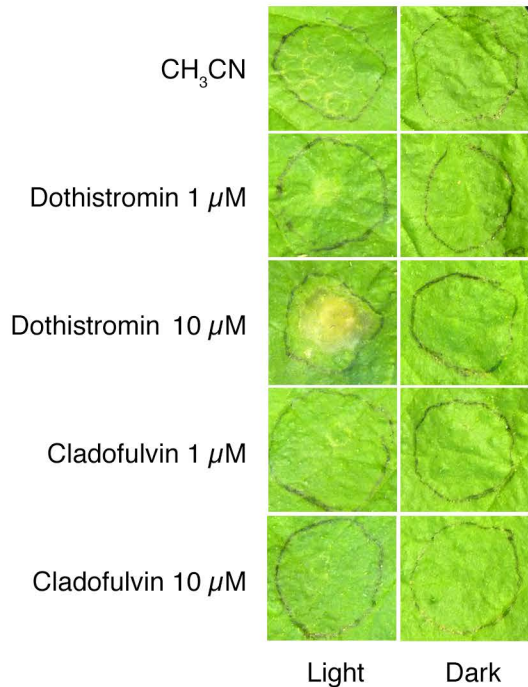

*Solanum lycopersicum*

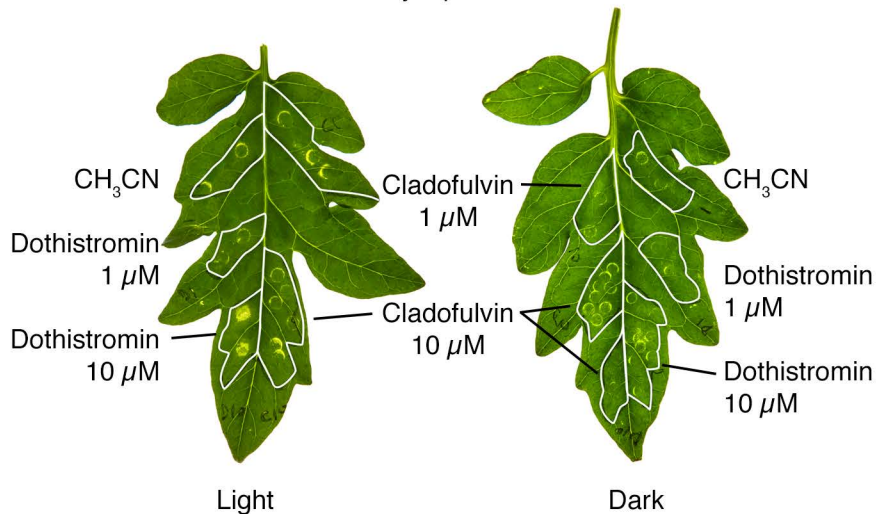

**Fig. S9. Toxicity of cladofulvin on Solanaceous plants.** Purified cladofulvin was diluted to 1 and 10  $\mu\text{M}$ . The same amount of acetonitrile ( $\text{CH}_3\text{CN}$ ) and same concentrations of purified dothistromin were used as a negative and controls, respectively.

**Table S1. Accession numbers of protein sequences used in phylogenetic analyses.**

| <b>Core enzyme</b> | <b>Fungal species</b>              | <b>GenBank accession number</b> |
|--------------------|------------------------------------|---------------------------------|
| SormaPks           | <i>Sordaria macrospora</i>         | CAM35471.1                      |
| PodanPks1          | <i>Podospora anserina</i>          | XP_001910795.1                  |
| MagorAlb1          | <i>Magnaporthe oryzae</i>          | XP_003715434.1                  |
| NodspPks1          | <i>Nodulisporium sp. ATCC74245</i> | AAD38786.1                      |
| CollaPks1          | <i>Colletotrichum lagenaria</i>    | BAA18956.1                      |
| GlaloPks1          | <i>Glarea lozoyensis</i>           | AAN59953.1                      |
| ElsfaPks1          | <i>Elsinoe fawcettii</i>           | ABU63483.1                      |
| WandePks1          | <i>Wangiella dermatidis</i>        | AAD31436.3                      |
| DotsePksA          | <i>Dothistroma septosporum</i>     | EME39092.1                      |
| AspniStcA          | <i>Aspergillus nidulans</i>        | AAC49191.1                      |
| AspfiPksA          | <i>Aspergillus flavus</i>          | AAS90093.1                      |
| CerniCtb1          | <i>Cercospora nicotianae</i>       | AAT69682.1                      |
| NechaPKSN          | <i>Nectria haematococca</i>        | AAS48892.1                      |
| AspniYwa1          | <i>Aspergillus nidulans</i>        | CAA46695.2                      |
| AspniAlbA          | <i>Aspergillus niger</i>           | EHA28527.1                      |
| AspfuAlb1          | <i>Aspergillus fumigatus</i>       | AAC39471.1                      |
| GibzePks12         | <i>Gibberella zeae</i>             | AAU10633.1                      |
| GibfuBik1          | <i>Gibberella fujikuroi</i>        | CAB92399.1                      |
| AspteAcas          | <i>Aspergillus terreus</i>         | XP_001217072.1                  |
| AspniMdpG          | <i>Aspergillus nidulans</i>        | XP_657754.1                     |
| AspfuEncA          | <i>Aspergillus fumigatus</i>       | XP_746435.1                     |
| GibzePks13         | <i>Gibberella zeae</i>             | ABB90282.1                      |
| HypsuHpm3          | <i>Hypomyces subiculosus</i>       | ACD39762.1                      |
| MonpuPksCT         | <i>Monascus purpureus</i>          | BAD44749.1                      |
| AspniAN1034        | <i>Aspergillus nidulans</i>        | EAA65602.1                      |
| PenbrMpaC          | <i>Penicillium brevicompactum</i>  | ADY00130.1                      |
| GibzeFsl1          | <i>Gibberella zeae</i>             | XP_390640.1                     |
| CocheNps1          | <i>Cochliobolus heterostrophus</i> | AAX09983.1                      |
| CocheNps3          | <i>Cochliobolus heterostrophus</i> | AAX09985.1                      |
| FuseqEsyn1         | <i>Fusarium equiseti</i>           | Q00869.2                        |
| UstmaSid2          | <i>Ustilago maydis</i>             | AAB93493.1                      |
| MagorSsm1          | <i>Magnaporthe oryzae</i>          | XP_003719607.1                  |
| CocheNps2          | <i>Cochliobolus heterostrophus</i> | AAX09984.1                      |
| SchpoSib1          | <i>Schizosaccharomyces pombe</i>   | CAB72227.1                      |
| AspfuSidC          | <i>Aspergillus fumigatus</i>       | XP_753088.1                     |
| UstmaFer3          | <i>Ustilago maydis</i>             | DAA04939.1                      |
| OmpolFso1          | <i>Omphalotus olearius</i>         | AAX49356.1                      |
| TriviTex1          | <i>Trichoderma virens</i>          | AAM78457.1                      |
| ClapuLpsA1         | <i>Claviceps purpurea</i>          | AET79183.1                      |
| CocheNps4          | <i>Cochliobolus heterostrophus</i> | AAX09986.1                      |
| AspfuPes1          | <i>Aspergillus fumigatus</i>       | XP_752404.1                     |
| CoccaHts1          | <i>Cochliobolus carbonum</i>       | Q01886.2                        |
| AspfuPesL          | <i>Aspergillus fumigatus</i>       | XP_751084.1                     |
| AltalAmt           | <i>Alternaria alternata</i>        | AAF01762.1                      |
| CocheNps5          | <i>Cochliobolus heterostrophus</i> | AAX09987.1                      |
| MagorSsm2          | <i>Magnaporthe oryzae</i>          | XP_003714007.1                  |
| GibzeNps6          | <i>Gibberella zeae</i>             | XP_383923.1                     |
| CocheNPS6          | <i>Cochliobolus heterostrophus</i> | AAX09988.1                      |

**Table S1. Accession numbers of protein sequences used in phylogenetic analyses (continued).**

| <b>Core enzyme</b> | <b>Fungal species</b>              | <b>GenBank accession number</b> |
|--------------------|------------------------------------|---------------------------------|
| AspfuSidD          | <i>Aspergillus fumigatus</i>       | XP_748662.1                     |
| CocheNps8          | <i>Cochliobolus heterostrophus</i> | AAX09990.1                      |
| EpifePerA          | <i>Epichloe festucae</i>           | BAE06845.2                      |
| AspteLDKS          | <i>Aspergillus terreus</i>         | AAD34559.1                      |
| MonpiMkB           | <i>Monascus pilosus</i>            | ABA02240.1                      |
| PenciMlcB          | <i>Penicillium citrinum</i>        | BAC20566.1                      |
| AspniAN1036        | <i>Aspergillus nidulans</i>        | EAA65604.1                      |
| CochePks1          | <i>Cochliobolus heterostrophus</i> | AAB08104.3                      |
| CochePks2          | <i>Cochliobolus heterostrophus</i> | ABB76806.1                      |
| AltsoPksN          | <i>Alternaria solani</i>           | BAD83684.1                      |
| GibzePks4          | <i>Gibberella zeae</i>             | ABB90283.1                      |
| HypsuHpm8          | <i>Hypomyces subiculosus</i>       | ACD39767.1                      |
| FusoxFum1          | <i>Fusarium oxysporum</i>          | ACB12550.1                      |
| AltbrDep5          | <i>Alternaria brassicicola</i>     | ACZ57548.1                      |
| BotciBcBOA9        | <i>Botrytis cinerea</i>            | CBX87032.1                      |
| AspweAomsas        | <i>Aspergillus westerdijkiae</i>   | AAS98200.1                      |
| Bysni6Msas         | <i>Byssochlamys nivea</i>          | AAK48943.1                      |
| PengrMsas          | <i>Penicillium griseofulvum</i>    | P22367.1                        |
| MagorAce1          | <i>Magnaporthe oryzae</i>          | CAG28797.1                      |
| Chagl11063         | <i>Chaetomium globosum</i>         | XP_001220460.1                  |
| MagorSyn2          | <i>Magnaporthe oryzae</i>          | CAG28798.1                      |
| AspclaCssA         | <i>Aspergillus clavatus</i>        | XP_001270543.1                  |
| Stano251           | <i>Stagonospora nodorum</i>        | XP_001790998.1                  |
| Cocim06629         | <i>Coccidioides immitis</i>        | XP_001242733.1                  |
| Uncre03815         | <i>Uncinocarpus reesii</i>         | EEP78969.1                      |
| Chagl15110         | <i>Chaetomium globosum</i>         | XP_001221381.1                  |
| AspteLNKS          | <i>Aspergillus terreus</i>         | Q9Y8A5.1                        |
| MonpiMkA           | <i>Monascus pilosus</i>            | ABA02239.1                      |
| PenciMlcA          | <i>Penicillium citrinum</i>        | BAC20564.1                      |
| MagorSyn6          | <i>Magnaporthe oryzae</i>          | CAG29113.1                      |
| Fusox9586          | <i>Fusarium oxysporum</i>          | EGU88865.1                      |
| GibmoPks1          | <i>Gibberella moniliformis</i>     | AAR92208.1                      |
| Aspcla023380       | <i>Aspergillus clavatus</i>        | XP_001269050.1                  |
| FusheEqiS          | <i>Fusarium heterosporum</i>       | AGO86662.1                      |
| BotciBcBOA6        | <i>Botrytis cinerea</i>            | CAP58786.1                      |
| GibmoFusS          | <i>Gibberella moniliformis</i>     | AAT28740.1                      |
| MetroNgs1          | <i>Metarhizium robertsii</i>       | ACS68554.1                      |
| AspfuPsoA          | <i>Aspergillus fumigatus</i>       | ABS87601.1                      |
| Aspte00325         | <i>Aspergillus terreus</i>         | EAU38971.1                      |
| PenexCheA          | <i>Penicillium expansum</i>        | CAO91861.1                      |
| BeabaTenS          | <i>Beauveria bassiana</i>          | CAL69597.1                      |
| AspniApdA          | <i>Aspergillus nidulans</i>        | XP_681681.1                     |
| AsporCpaA          | <i>Aspergillus oryzae</i>          | BAK26562.1                      |
| AspfICpaA          | <i>Aspergillus flavus</i>          | BAI43678.1                      |

**Table S2. Oligonucleotides used in this study.**

| Name           | Sequence (5' to 3')   | Name             | Sequence (5' to 3')   |
|----------------|-----------------------|------------------|-----------------------|
| <i>qHPS1_F</i> | CTTGCCAGTGGGTCTACCAT  | <i>q197287_F</i> | AGATCCGGCGTGAATACAAC  |
| <i>qHPS1_R</i> | TAGGATCACTTCGCCTGCTT  | <i>q197287_R</i> | TTCCTGCCAGCTTGACTTTT  |
| <i>qPKSA_F</i> | TCCCGGCTCAGATTGATAAC  | <i>q184391_F</i> | AGCTTCGGTCATCTCAAGGA  |
| <i>qPKSA_R</i> | CCGACGTATAGAGGCTGCTC  | <i>q184391_R</i> | CGAGTGTGCGAGGAACACTGA |
| <i>qPKS1_F</i> | GTGATGCACTGAAGGCTCAA  | <i>q184392_F</i> | CAGTTCCAAAGCCTGCCTAC  |
| <i>qPKS1_R</i> | AGCAAGTTGGTTCGAGCTGAT | <i>q184392_R</i> | AGGAAGTGTGGACTGGATGC  |
| <i>qPKS2_F</i> | TGTGGCTATTGCACTCGAAG  | <i>q184393_F</i> | GTGGTGGATTCAGCCTGTT   |
| <i>qPKS2_R</i> | TCCATTGATCTGATGCCGTA  | <i>q184393_R</i> | TCATCGACGATTGTGGTGT   |
| <i>qPKS3_F</i> | GCGTAGGTCAGGCTGCTATC  | <i>q184394_F</i> | TCTGTCTAGACGGCGAGGAT  |
| <i>qPKS3_R</i> | CGAGTGAGTTGAGGACGACA  | <i>q184394_R</i> | CTTCGAAGATCCGTTTCGAG  |
| <i>qPKS5_F</i> | TGCTGGTATCGTGGGTAACA  | <i>q184396_F</i> | GGACCTGGAGCATCACATCT  |
| <i>qPKS5_R</i> | CAGAGTTCTCGGCCAGGTAG  | <i>q184396_R</i> | GGATGGTGTACCCCGTAAAC  |
| <i>qPKS6_F</i> | CTGCATATCGGAGCAGTGAA  | <i>q184397_F</i> | CTTGTCAAGGTCATGCGAGA  |
| <i>qPKS6_R</i> | TTGCGTTTCTTGAAGTCGTG  | <i>q184397_R</i> | GGCAGATCGCTTGAGTATCC  |
| <i>qPKS7_F</i> | AGCTGAAGAACGGAAGTGGA  | <i>q184398_F</i> | GATGATCGGACACTGGACCT  |
| <i>qPKS7_R</i> | GTGTTCTGTTGGGCACAATG  | <i>q184398_R</i> | CACACCCAAAGGCGTAAGAT  |
| <i>qPKS8_F</i> | TGACATCGCAGACTTCCTTG  | <i>q184401_F</i> | AACAGCAGAAAGGACGGAAA  |
| <i>qPKS8_R</i> | AGGGCAAAGGAAGCGATATT  | <i>q184401_R</i> | GAGTTCCTGGGTTCTCTCC   |
| <i>qNPS2_F</i> | TGGACTCACAGCGCACTATC  | <i>q184402_F</i> | AACAGCAGAAAGGACGGAAA  |
| <i>qNPS2_R</i> | ATACGGACGGTCTTGTCTGG  | <i>q184402_R</i> | GAGTTCCTGGGTTCTCTCC   |
| <i>qNPS3_F</i> | GTACACTTGTGGCGGATGTG  |                  |                       |
| <i>qNPS3_R</i> | TCATGTACGCTGGAAGCAAG  |                  |                       |
| <i>qNPS4_F</i> | GTGGCTCTAGCGGCATACTC  |                  |                       |
| <i>qNPS4_R</i> | TCCTGCCAGTAGCTGGTCTT  |                  |                       |
| <i>qNPS6_F</i> | AATGGCTAAAACACGCCATC  |                  |                       |
| <i>qNPS6_R</i> | TCCAACGAATTCCAGACTCC  |                  |                       |
| <i>qNPS8_F</i> | ACTCTCTTCGTTTGGCAGGA  |                  |                       |
| <i>qNPS8_R</i> | CTCATGAGCTTTCGTTGGTA  |                  |                       |
| <i>qNPS9_F</i> | ATATGGCCCCGACTCACTACG |                  |                       |
| <i>qNPS9_R</i> | CAGTGAGCGATTCTGTTGGA  |                  |                       |
| <i>qDMA1_F</i> | TGTGCTGGTACTGCCTTCAG  |                  |                       |
| <i>qDMA1_R</i> | CCGTCTTGTTGACATGTTGC  |                  |                       |

Oligonucleotides used to measure *actin*, *tubulin*, *Avr4* and *Avr9* gene expression are the same as in de Wit *et al.* (2012).

**Table S3. <sup>1</sup>H and <sup>13</sup>C NMR data for cladofulvin.**

The NMR data collected for the purified compound is identical to the values reported for cladofulvin in the literature.

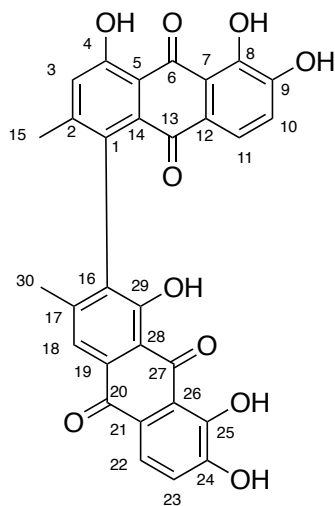

| Position | $\delta\text{C}$ | $\delta\text{H}$        |
|----------|------------------|-------------------------|
| 1        | 129.3            | -                       |
| 2        | 149.3            | -                       |
| 3        | 124.7            | 7.35, s, 1H             |
| 4        | 162.3            | -                       |
| 5        | 115.2            | -                       |
| 6        | 181.4            | -                       |
| 7        | 115.9            | -                       |
| 8        | 149.8            | -                       |
| 9        | 152.1            | -                       |
| 10       | 121.1            | 7.11, d, 1H, J = 8.2 Hz |
| 11       | 121.4            | 7.46, d, 1H, J = 8.2 Hz |
| 12       | 125.1            | -                       |
| 13       | 193.3            | -                       |
| 14       | 131.3            | -                       |
| 15       | 19.6             | 2.03, s, 3H             |
| 16       | 136.0            | -                       |
| 17       | 146.3            | -                       |
| 18       | 121.5            | 7.77, s, 1H, J = 8.1 Hz |
| 19       | 132.3            | -                       |
| 20       | 180.9            | -                       |
| 21       | 124.9            | -                       |
| 22       | 121.4 (2xC)      | 7.76, d, 1H             |
| 23       | 120.9            | 7.21, d, 1H, J = 8.1 Hz |
| 24       | 150.4            | -                       |
| 25       | 152.3            | -                       |
| 26       | 116.4            | -                       |
| 27       | 193.4            | -                       |
| 28       | 114.1            | -                       |
| 29       | 162.5            | -                       |
| 30       | 19.5             | 2.02, s, 3H             |

**Table S4. Functional annotation of *Cladosporium fulvum* key secondary metabolism enzymes.**

| Gene        | Protein ID <sup>a</sup>  | Best BlastP hit (NCBI) <sup>b</sup>                                            | e-value | IPS domains <sup>c</sup>                  | IGS domains <sup>c</sup>                     | ASMPKS domains <sup>c</sup> | Predicted precursor <sup>d</sup>                                                                            |
|-------------|--------------------------|--------------------------------------------------------------------------------|---------|-------------------------------------------|----------------------------------------------|-----------------------------|-------------------------------------------------------------------------------------------------------------|
| <i>PKSA</i> | 194256                   | AAZ95017.1 polyketide synthase <i>Mycosphaerella pini</i>                      | 0.0     | KS-AT-ACP-ACP-ACP-TE                      | KS-AT-?-ACP-ACP-ACP-TE                       | KS-AT-ACP-ACP-ACP-TE        | Malonyl-CoA                                                                                                 |
| <i>PKS1</i> | 191425                   | EFQ92987.1 hypothetical protein PTT_09773 <i>Pyrenophora teres</i>             | 0.0     | KS-AT-ACP-ACP-TE                          | KS-AT-?-ACP-ACP-TE                           | KA-AT-ACP-ACP-TE            | Malonyl-CoA                                                                                                 |
| <i>PKS2</i> | 186350                   | CBI52337.1 putative polyketide synthase <i>Sordaria macrospora</i>             | 0.0     | KS-AT-ME-ER-KR-ACP                        | KS-AT-DH-?-?-KR-ACP                          | KS-AT-DH-KR-ACP             | Methylmalonyl-CoA                                                                                           |
| <i>PKS3</i> | 188474                   | AAR90260.1 polyketide synthase <i>Cochliobolus heterostrophus</i>              | 0.0     | KS-AT-ME-ER-KR-ACP                        | KS-AT-DH-?-ER-KR                             | KS-AT-DH-ER-KR              | Malonyl-CoA                                                                                                 |
| <i>PKS4</i> | 188483                   | XP_002482968.1 putative polyketide synthase <i>Talaromyces stipitatus</i>      | 1e-62   | KS-DH                                     | none                                         | none                        | n.d.                                                                                                        |
| <i>PKS5</i> | 184292                   | XP_003042842.1 hypothetical NECHADRAFT_106474 <i>Nectria haematococca</i>      | 0.0     | KS-AT-ER-KR-ACP                           | KS-AT-?-ER-KR                                | KS-AT-DH-ER-KR-ACP          | Malonyl-CoA                                                                                                 |
| <i>PKS6</i> | 184395                   | XP_002482968.1 putative polyketide synthase <i>Talaromyces stipitatus</i>      | 0.0     | KS-AT-ACP                                 | KS-AT-?-ACP                                  | KS-AT-ACP                   | Malonyl-CoA                                                                                                 |
| <i>PKS7</i> | 196875                   | ADO14690.1 cercosporin polyketide synthase <i>Mycosphaerella coffeicola</i>    | 0.0     | KS-AT-ACP-ACP-TE                          | KS-AT-ACP-ACP-TE                             | KS-AT-ACP-ACP-TE            | Malonyl-CoA                                                                                                 |
| <i>PKS8</i> | 196070                   | AAR90246.1 PKS10 <i>Botryotinia fuckeliana</i>                                 | 0.0     | KS-AT-ER-KR-ACP                           | ?-?-ER-KR-ACP                                | KS-AT-DH-ER-KR-ACP          | Methylmalonyl-CoA                                                                                           |
| <i>PKS9</i> | 188153                   | XP_657754.1 hypothetical protein AN0150.2 <i>Aspergillus nidulans</i>          | 0.0     | KS-AT-ACP                                 | KS-?-ACP                                     | KS-AT-ACP                   | Malonyl-CoA                                                                                                 |
| <i>HPS1</i> | 192259                   | XP_002486604.1 putative PKS-NRPS <i>Talaromyces stipitatus</i>                 | 0.0     | KS-AT-ME-KR-ACP-C-A-PCP                   | KS-AT-?-?-KR-?-A-PCP                         | KS-AT-DH-KR-ACP             | Malonyl-CoA / DMAFASVI new signature                                                                        |
| <i>HPS2</i> | 188140 / 188141 / 188142 | XP_002153037.1 PMAA_009380 <i>Penicillium marneffeii</i>                       | 0.0     | KS-AT-ME-KR-ACP                           | ?-?-KR-ACP                                   | AT-DH-KR-ACP                | Malonyl-CoA                                                                                                 |
| <i>NPS1</i> | 185841                   | ACJ04424.1 aureobasidin A1 biosynthesis complex <i>Aureobasidium pullulans</i> | 0.0     | C-A-PCP-C                                 | ?-A-ME-PCP                                   | -                           | DAWLYVAV C <sub>5</sub> SsA-M1-D-Ala Cyclosporine synthetase C <sub>5</sub> SsA Val                         |
| <i>NPS2</i> | 193954                   | AAD00581.2 peptide synthetase <i>Aureobasidium pullulans</i>                   | 0.0     | A-PCP-C-A-PCP-C-PCP-C-A-PCP-C-PCP-C-PCP-C | A1-PCP-?-A2-PCP-?-PCP-?-A3-PCP-?-PCP-?-PCP-? | -                           | A1: DVFELIMI Gly / A2: DVFSVAXX Ser/Ala / A3: DVLDIGGI N <sup>5</sup> -hydroxy-N <sup>5</sup> -acetyl-L-Orn |
| <i>NPS3</i> | 186614                   | XP_002380231.1 putative NRPS <i>Aspergillus flavus</i>                         | 0.0     | A-PCP-C-A-PCP-C-C-A-PCP-C-A-PCP-C         | A1-PCP-?-A2-PCP-?-?-PCP-?-A3-PCP             | -                           | A1: DVWNLSTF EntF/SyrE Ser / A2: DVICVA-V new signature / A3: DVSYAGXX new signature                        |
| <i>NPS4</i> | 192008                   | EFY94582.1 NRPS <i>Metarhizium anisopliae</i>                                  | 0.0     | A-PCP-C-A-PCP-C-C                         | A1-PCP-?-A2-PCP-?                            | -                           | A1: DASDIAVP new signature / A2: DVSDVGPP new signature                                                     |
| <i>NPS5</i> | 191780 / 191781          | XP_002843341.1 NRPS <i>Arthroderma otae</i>                                    | 0.0     | C-A-PCP-C-C-A-PCP                         | ?-PCP-?-?-PCP                                | -                           | n.d.                                                                                                        |



**Table S4. Functional annotation of *Cladosporium fulvum* key secondary metabolism enzymes (continued).**

| Gene         | Protein ID <sup>a</sup>                    | Best BlastP hit (NCBI) <sup>b</sup>                                                           | e-value | IPS domains <sup>c</sup>                                  | IGS domains <sup>c</sup>                       | ASMPKS domains <sup>c</sup> | Predicted precursor <sup>d</sup>                                                                              |
|--------------|--------------------------------------------|-----------------------------------------------------------------------------------------------|---------|-----------------------------------------------------------|------------------------------------------------|-----------------------------|---------------------------------------------------------------------------------------------------------------|
| <i>NPS6</i>  | 189598                                     | XP_001267502.1 putative NRPS <i>Neosartorya fischeri</i>                                      | 8e-141  | A-PCP                                                     | A-?-PCP                                        | -                           | A: DAGDIGFP new signature                                                                                     |
| <i>NPS7</i>  | 196498 /<br>196499 /<br>196500 /<br>196501 | Q01886.2 HC-toxin synthetase <i>Cochliobolus carbonum</i>                                     | 2e-84   | A-C-A-A                                                   | A1-?-A2-A3                                     | -                           | A1: DASFVIGF new signature /<br>A2: DNQ-VGAI new signature /<br>A3: DVYARGXX new signature                    |
| <i>NPS8</i>  | 191358                                     | AAX09983.1 NPS1 <i>Cochliobolus heterostrophus</i>                                            | 0.0     | A-PCP-C-A-PCP-C                                           | A1-ME-PCP-?-A2-PCP                             | -                           | A1: DAMVVGGV TycB-M2-L-Phe/L-Trp tyrocidine synthetase /<br>A2: DGFFEGIP BacA/FenB Ile                        |
| <i>NPS9</i>  | 190730                                     | XP_001821068.1 SidC <i>Aspergillus oryzae</i>                                                 | 0.0     | A-PCP-C-A-PCP-C-<br>A-PCP-C-PCP-C-<br>PCP-C               | A1-PCP-?-A2-PCP-<br>?-A3-PCP-?-PCP-?-<br>PCP-? | -                           | A1: DPMMWMAI Ser / A2:<br>DVQHTITV Gly / A3: DVGSSGAI<br>N <sup>5</sup> -hydroxy-N <sup>5</sup> -acetyl-L-Orn |
| <i>NPS10</i> | 196066 /<br>196067 /<br>196068             | XP_002486632.1 putative aminoadipate-semialdehyde dehydrogenase <i>Talaromyces stipitatus</i> | 2e-56   | C-A-PCP-A-C                                               | PCP                                            | -                           | n.d.                                                                                                          |
| <i>DMA1</i>  | 191785                                     | XP_003298803.1 hypothetical protein PTT_09620 <i>Pyrenophora teres f. teres</i>               | 3e-128  | IPR017795<br>Aromatic<br>prenyltransferase,<br>DMATS type | -                                              | -                           | -                                                                                                             |

<sup>a</sup> Protein ID from the Doe Joint Genome Institute resource ([www.jgi.doe.gov](http://www.jgi.doe.gov)).

<sup>b</sup> BlastP was performed using the non-redundant protein database of NCBI ([www.ncbi.nlm.nih.gov](http://www.ncbi.nlm.nih.gov)).

<sup>c</sup> Search for conserved domains was carried out with InterproScan (IPS; [www.ebi.ac.uk](http://www.ebi.ac.uk)), PKS/NRPS analysis website (IGS; [nrps.igs.umaryland.edu](http://nrps.igs.umaryland.edu)) and ASMPKS ([gate.smallsoft.co.kr:8008/~hstae/asmpks/pks\\_prediction.pl](http://gate.smallsoft.co.kr:8008/~hstae/asmpks/pks_prediction.pl)). KS: keto-synthase; AT: acyl transferase; DH: dehydratase; ER: enoyl reductase; KR: keto-reductase; ME: methyl transferase; ACP: acyl carrier protein; TE: thio-esterase; A: adenylation; C: condensation; PCP: peptidyl carrier protein.

<sup>d</sup> Prediction made by ASMPKS for acyl specificity and by PKS/NRPS analysis website for amino acid specificity. Signatures of A domains were also compared to those described for siderophore synthetases and bacterial synthetases. n.d.: not determined.
